# Supplementary material for: RsfA (YbeB) Proteins Are Conserved Ribosomal Silencing Factors
Source: PLOS journal article supplement (doi:10.1371/journal.pgen.1002815), 2012-07-19

# Fig. S3

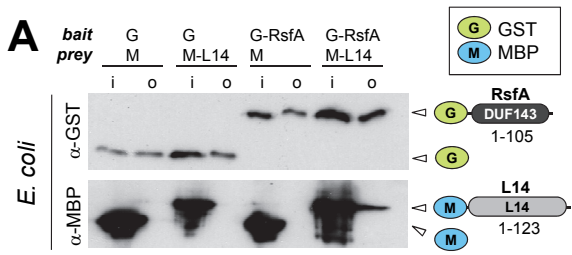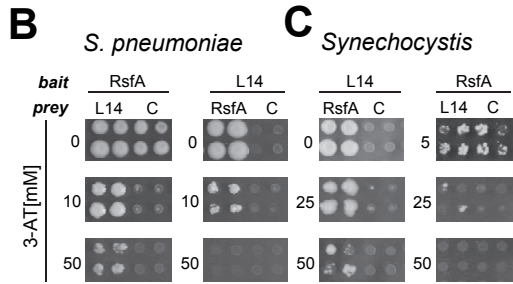

Supplement: S4 (10.1371/journal.pgen.1002815.s004) [file journal.pgen.1002815.s004]
